# Supplementary material for: Exploring the Molecular Crosstalk between Pancreatic Bud and Mesenchyme in Embryogenesis: Novel Signals Involved
Source: MDPI journal article supplement (doi:10.3390/ijms20194900), 2019-10-03
Supplement: s1 [file s1]

## Supplementary Figure S1

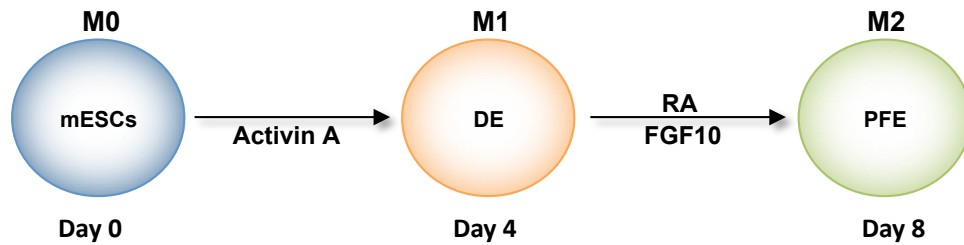

**Supplementary Figure S1:** Schematic protocol of directed differentiation from mESCs into PFE. ESCs were plated at 50.000 cells/cm<sup>2</sup> at day0 (M0) in a pro differentiative medium supplemented with Matrigel (200µg/ml) and Activin A (20ng/ml) to induce the DE formation (M1). The cells were then treated with Retinoic Acid (5µM) and FGF10 (10ng/ml) until the end of protocol to promote the Posterior Foregut Endoderm (PFE) formation (M2).
